# Supplementary material
Source: publisher figshare collection journal article supplement (https://asha.figshare.com/articles/dataset/_/27165450)
Supplement: Supplementary file 1 [file 1]

**Supplemental Material S1.** OI, OT, PT, and FOIS scores across each patient with IBM.

| Patient Identifier | C1 | C2 | C3 | C4 | C5 | C6 | C7 | C8 | C9 | C10 | C11 | C12 | C13 | C14 | C15 | C16 | C17 | OT Score | PT Score | FOIS Score |
|--------------------|----|----|----|----|----|----|----|----|----|-----|-----|-----|-----|-----|-----|-----|-----|----------|----------|------------|
| 1                  | 1  | 1  | 3  | 0  | 2  | 0  | 1  | 1  | 2  | 2   | 1   | 1   | --  | 2   | 3   | 4   | --  | 6        | --       | 1          |
| 2                  | 0  | 1  | 0  | 0  | 2  | 1  | 0  | 1  | 1  | 2   | 1   | 1   | 0   | 2   | 2   | 2   | 1   | 4        | 12       | 6          |
| 3                  | 0  | 0  | 2  | 3  | 2  | 2  | 0  | 1  | 1  | 1   | 1   | 2   | 0   | 1   | 3   | 4   | 1   | 9        | 14       | 7          |
| 4                  | 0  | 0  | 0  | 0  | 0  | 0  | 0  | 0  | 0  | 0   | 0   | 0   | 0   | 0   | 0   | 0   | 0   | 0        | 0        | 7          |
| 5                  | 1  | 1  | 3  | 1  | 3  | 3  | 1  | 2  | 2  | 2   | 2   | 2   | --  | 2   | 4   | 4   | --  | 11       | --       | 1          |
| 6                  | 1  | -- | 3  | 2  | 3  | 3  | 0  | 1  | 1  | 2   | 2   | 0   | 0   | 2   | 3   | 3   | --  | --       | 14       | 1          |
| 7                  | 0  | 1  | 3  | 1  | 0  | 0  | 0  | 2  | 2  | 2   | 2   | 2   | --  | 3   | 2   | 4   | --  | 5        | --       | 1          |
| 8                  | 0  | 0  | 3  | 2  | 2  | 3  | 1  | 1  | 2  | 2   | 1   | 1   | 0   | 1   | 3   | 3   | 1   | 10       | 15       | 1          |
| 9                  | 1  | 0  | 3  | 1  | 2  | 2  | 2  | 1  | 1  | 2   | 1   | 2   | 3   | 2   | 2   | 3   | 2   | 8        | 19       | 1          |
| 10                 | 0  | 0  | 2  | 0  | 2  | 0  | 0  | 0  | 0  | 0   | 0   | 0   | 1   | 1   | 0   | 0   | 1   | 4        | 2        | 7          |
| 11                 | 0  | 0  | 0  | 3  | 2  | 2  | 0  | 0  | 1  | 0   | 0   | 1   | 0   | 1   | 2   | 3   | 0   | 7        | 8        | 6          |
| 12                 | 2  | 2  | 1  | 3  | 3  | 3  | 0  | 1  | 0  | 0   | 1   | 1   | 0   | 1   | 2   | 2   | 1   | 14       | 8        | 1          |
| 13                 | 0  | 3  | 1  | 3  | 2  | 0  | 1  | 1  | 1  | 2   | 1   | 1   | 2   | 1   | 3   | 3   | --  | 9        | 16       | 4          |

**Note.** C - Component (see Table 1 in the manuscript for the descriptive name of each component), FOIS - Functional Oral Intake Scale, IBM - Sporadic inclusion body myositis, OI - Overall Impression (values under each component), OT - Oral Total, PT - Pharyngeal Total.
