# Supplementary material
Source: publisher figshare collection journal article supplement (https://asha.figshare.com/articles/dataset/_/27165450)

## Supplemental Material S2. Repeated OT and PT scores across six patients with IBM.

The plots display changes in Oral Total (OT) and Pharyngeal Total (PT) scores over time for patients with sporadic inclusion body myositis (IBM) who had a repeated modified barium swallow study (MBSS) for analysis. Each patient is represented numerically from 1-6 with a different colored dot. The arrows indicate the direction of change in scores from each patient's baseline to subsequent MBSS. Dots without arrows indicate scores that were captured within the same year but did not change.

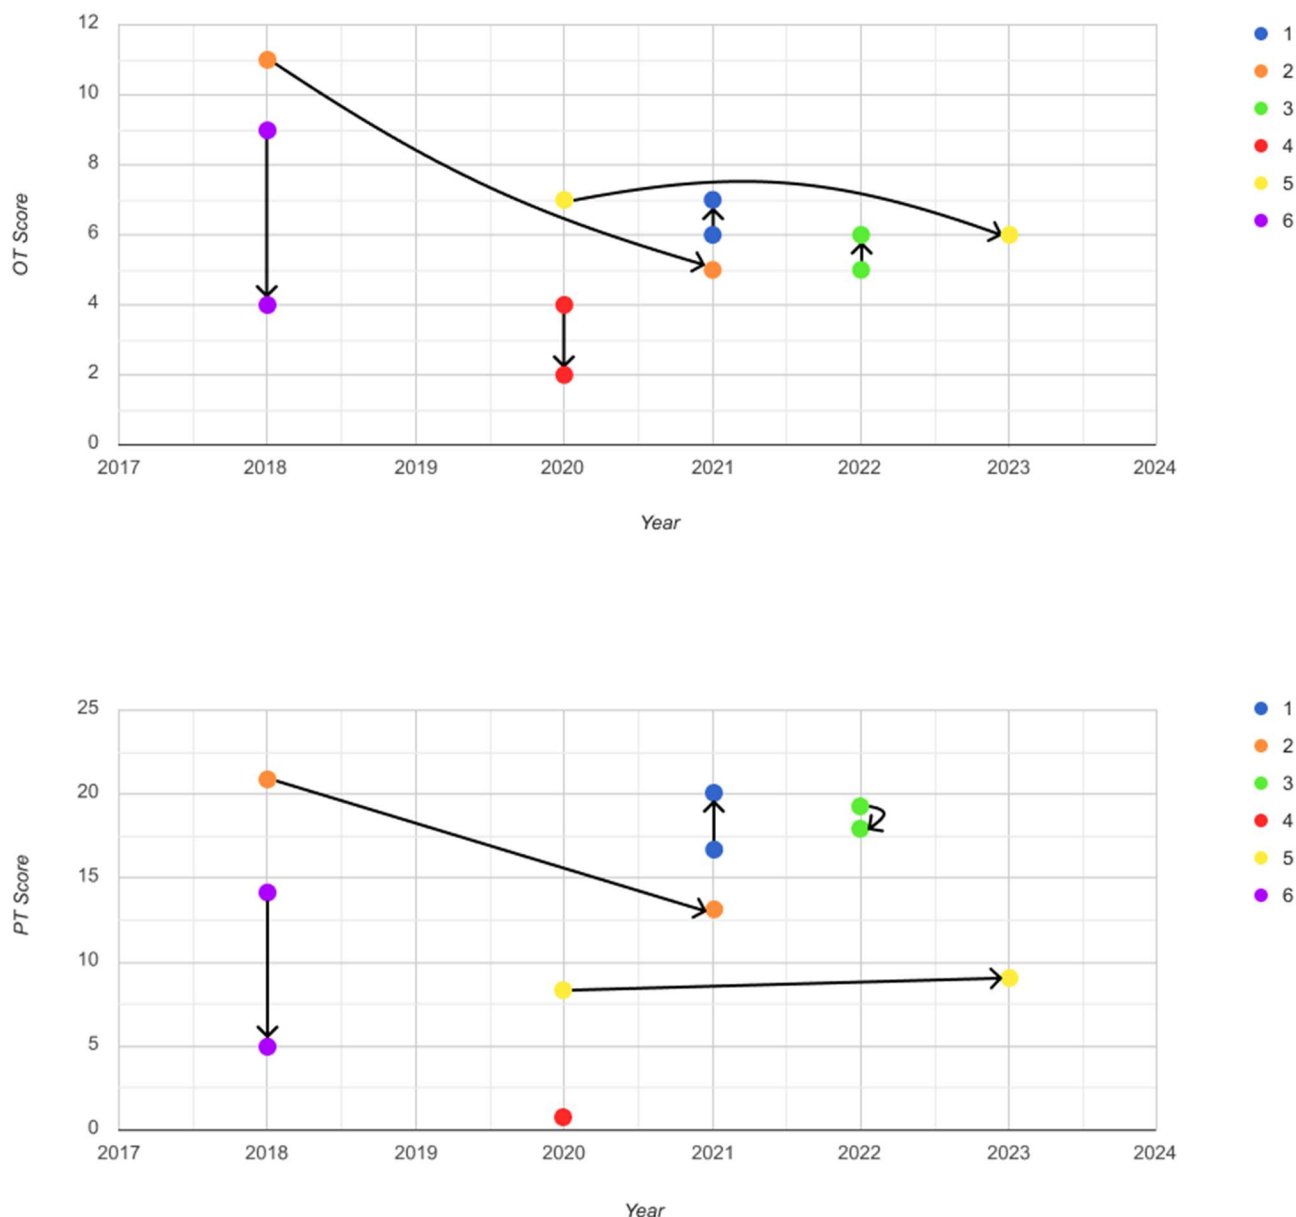

Supplement: Supplementary file 2 [file 1]
